# Supplementary material
Source: MDPI journal article supplement (https://www.mdpi.com/1660-4601/12/4/3707)
Supplement: s1 [file s1]

## Longitudinal Changes in Functioning and Disability in Patients with Disorders of Consciousness: The Importance of Environmental Factors

**Table S1.** Overview of ICF-DOC dedicated checklist for patients with disorders of consciousness.

| Code | Body Functions                   | Code | Body Structures                         | Code | Activities & Participation                      | Code | Environmental Factors                                                                  |
|------|----------------------------------|------|-----------------------------------------|------|-------------------------------------------------|------|----------------------------------------------------------------------------------------|
| b110 | Consciousness functions          | s110 | Structure of brain                      | d110 | Watching                                        | e110 | Products or substances for personal consumption                                        |
| b114 | Orientation functions            | s3   | Structures involved in voice and speech | d115 | Listening                                       | e115 | Products and technology for personal use in daily living                               |
| b117 | Intellectual functions           |      |                                         | d175 | Solving problems                                | e120 | Products and technology for personal indoor and outdoor mobility and transportation    |
| b130 | Energy and drive functions       | s410 | Structure of cardiovascular system      | d210 | Undertaking a single task                       |      |                                                                                        |
| b134 | Sleep functions                  |      |                                         | d220 | Undertaking a multiple tasks                    | e125 | Products and technology for communication                                              |
| b140 | Attention functions              | s430 | Structure of respiratory system         | d310 | Communicating with-receiving-spoken messages    | e150 | Design, construction and building products and technology of buildings for public use  |
| b144 | Memory functions                 | s530 | Structure of stomach                    |      |                                                 |      |                                                                                        |
| b152 | Emotional functions              | s610 | Structure of urinary system             | d315 | Communicating with-receiving-nonverbal messages | e155 | Design, construction and building products and technology of buildings for private use |
| b156 | Perceptual functions             | s710 | Structure of head and neck region       |      |                                                 |      |                                                                                        |
| b164 | Higher-level cognitive functions |      |                                         | d330 | Speaking                                        | e225 | Climate                                                                                |
| b167 | Mental functions of language     | s720 | Structure of shoulder region            | d335 | Producing nonverbal messages                    | e240 | Light                                                                                  |
| b210 | Seeing functions                 | s730 | Structure of upper extremity            | d350 | Conversation                                    | e250 | Sound                                                                                  |

Table S1. Cont.

| Code  | Body Functions                   | Code | Body Structures              | Code | Activities & Participation           | Code | Environmental Factors                                                   |
|-------|----------------------------------|------|------------------------------|------|--------------------------------------|------|-------------------------------------------------------------------------|
| b230  | Hearing functions                | s740 | Structure of pelvic region   | d415 | Maintaining a body position          | e310 | Immediate family                                                        |
| b235  | Vestibular functions             | s750 | Structure of lower extremity | d420 | Transferring oneself                 | e320 | Friends                                                                 |
| b280  | Sensation of pain                | s760 | Structure of trunk           | d430 | Lifting and carrying objects         | e325 | Acquaintances, peers, colleagues, neighbors and community members       |
| b310  | Voice functions                  | s810 | Structure of areas of skin   | d440 | Fine hand use                        |      |                                                                         |
| b410  | Heart functions                  |      |                              | d450 | Walking                              | e330 | People in positions of authority                                        |
| b420  | Blood pressure functions         |      |                              | d460 | Moving around in different locations | e340 | Personal care providers and personal assistants                         |
| b435  | Immunological system functions   |      |                              | d465 | Moving around using equipment        | e355 | Health professionals                                                    |
| b440  | Respiration functions            |      |                              | d470 | Using transportation                 | e360 | Other professionals                                                     |
| b445  | Respiratory muscle functions     |      |                              | d475 | Driving                              | e410 | Individual attitudes of immediate family members                        |
| b450  | Additional respiratory functions |      |                              | d510 | Washing oneself                      | e420 | Individual attitudes of friends                                         |
| b510  | Ingestion functions              |      |                              | d520 | Caring for body parts                | e440 | Individual attitudes of personal care providers and personal assistants |
| b5105 | Swallowing                       |      |                              | d530 | Toileting                            | e450 | Individual attitudes of health professionals                            |
| b515  | Digestive functions              |      |                              | d540 | Dressing                             | e455 | Individual attitudes of other professionals                             |
| b525  | Defecation functions             |      |                              | d550 | Eating                               | e460 | Societal attitudes                                                      |
| b5253 | Faecal continence                |      |                              | d560 | Drinking                             | e465 | Social norms, practices and ideologies                                  |
| b530  | Weight maintenance functions     |      |                              | d570 | Looking after one's health           | e525 | Housing services, systems and policies                                  |
| b620  | Urination functions              |      |                              | d620 | Acquisition of goods and services    | e535 | Communication services, systems and policies                            |
| b6202 | Urinary continence               |      |                              | d630 | Preparing meals                      | e540 | Transportation services, systems and policies                           |
| b640  | Sexual functions                 |      |                              | d640 | Doing house work                     | e550 | Legal services, systems and policies                                    |

Table S1. Cont.

| Code | Body Functions                          | Code | Body Structures | Code      | Activities & Participation         | Code | Environmental Factors                                          |
|------|-----------------------------------------|------|-----------------|-----------|------------------------------------|------|----------------------------------------------------------------|
| b710 | Mobility of joint functions             |      |                 | d660      | Assisting others                   | e555 | Associations and organizational services, systems and policies |
| b730 | Muscle power functions                  |      |                 | d710      | Basic interpersonal interactions   | e570 | Social security services, systems and policies                 |
| b735 | Muscle tone functions                   |      |                 | d710<br>6 | Differentiation of family persons  | e575 | General social support services, systems and policies          |
| b760 | Control of voluntary movement functions |      |                 | d720      | Complex interpersonal interactions | e580 | Health services, systems and policies                          |
| b765 | Involuntary movement functions          |      |                 | d730      | Relating with strangers            |      |                                                                |
| b8   | Functions of the skin                   |      |                 | d740      | Formal relationships               |      |                                                                |
|      |                                         |      |                 | d750      | Informal social relationships      |      |                                                                |
|      |                                         |      |                 | d760      | Family relationships               |      |                                                                |
|      |                                         |      |                 | d770      | Intimate relationships             |      |                                                                |
|      |                                         |      |                 | d810      | Informal education                 |      |                                                                |
|      |                                         |      |                 | d850      | Remunerative employment            |      |                                                                |
|      |                                         |      |                 | d860      | Basic economic transactions        |      |                                                                |
|      |                                         |      |                 | d870      | Economic self-sufficiency          |      |                                                                |
|      |                                         |      |                 | d910      | Community life                     |      |                                                                |
|      |                                         |      |                 | d920      | Recreation and leisure             |      |                                                                |
|      |                                         |      |                 | d930      | Religion and spirituality          |      |                                                                |
|      |                                         |      |                 | d950      | Political life and citizenship     |      |                                                                |
